# Supplementary material for: Sn–H bond additions to asymmetric trigonal phosphinidene-bridged dimolybdenum complexes
Source: Royal Society of Chemistry journal article supplement (doi:10.1039/c7ra06439j), 2017-01-01
Supplement: c7ra06439j2.pdf [file c7ra06439j2.pdf]

## Electronic Supporting Information

### **Sn–H Bond Additions to Asymmetric Trigonal Phosphinidene-Bridged Dimolybdenum Complexes**

M. Angeles Alvarez, Inmaculada Amor, M. Esther García, Daniel García-Vivó,\*  
Miguel A. Ruiz,\* and Jaime Suárez

*Departamento de Química Orgánica e Inorgánica / IUQOEM, Universidad de  
Oviedo, E-33071 Oviedo, Spain.*

## Table of Contents

|                                                                                         |          |
|-----------------------------------------------------------------------------------------|----------|
| * DFT-optimized geometries for complexes <b>1</b> to <b>3</b> and some derivatives      | pag. S3  |
| * <b>Table S1</b> : Selected geometrical parameters for compounds <b>2</b> and <b>3</b> | pag. S6  |
| * <b>Table S2</b> . Molecular orbitals of <i>syn-2</i>                                  | pag. S7  |
| * <b>Table S3</b> . Molecular orbitals of <i>syn-2R</i>                                 | pag. S9  |
| * <b>Table S4</b> . Molecular orbitals of <i>anti-2</i>                                 | pag. S11 |
| * <b>Table S5</b> . Molecular orbitals of <i>anti-2R</i>                                | pag. S14 |
| * <b>Table S6</b> . Molecular orbitals of <i>syn-3</i>                                  | pag. S16 |
| * <b>Table S7</b> . Molecular orbitals of <i>anti-3</i>                                 | pag. S19 |
| * <b>Table S8</b> . C-O stretching frequencies for compounds <b>2</b> and <b>3</b> .    | pag. S22 |
| * <b>Table S9</b> . Gibbs Free Energies of DFT-computed species                         | pag. S22 |
| * Rotational energy profile for compound <i>anti-2</i>                                  | pag. S23 |
| * Complete reference 42                                                                 | pag. S23 |

DFT-optimized geometries for complexes 1 to 3 and some derivatives, with <sup>t</sup>Bu groups (except the C<sup>1</sup> atoms) and most H atoms omitted for clarity.

*Optimized geometry of 1*

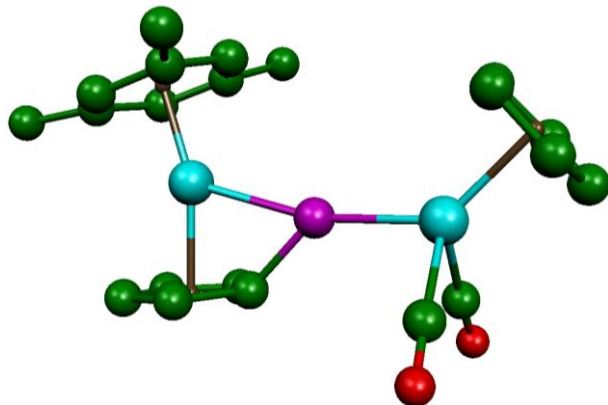

*Optimized geometry of syn-2*

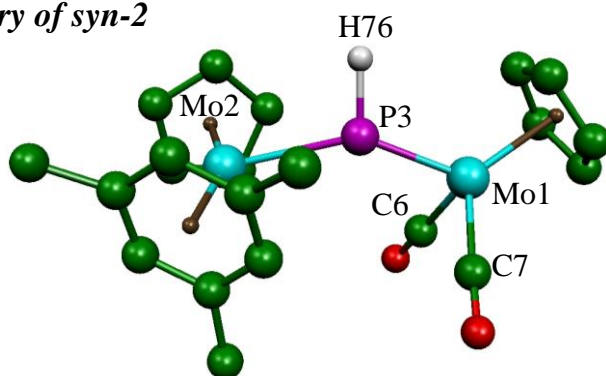

*Optimized geometry of syn-2R*

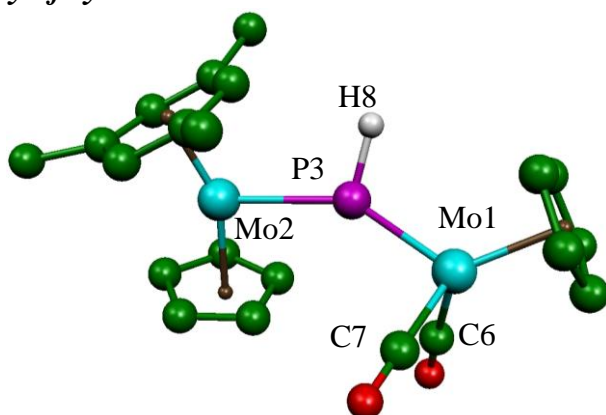

**Optimized geometry of *anti-2***

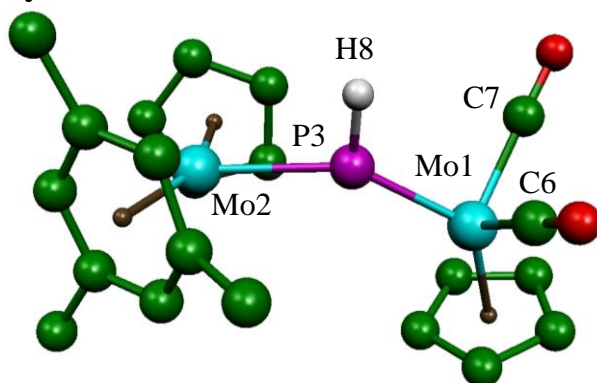

**Optimized geometry of *anti-2R***

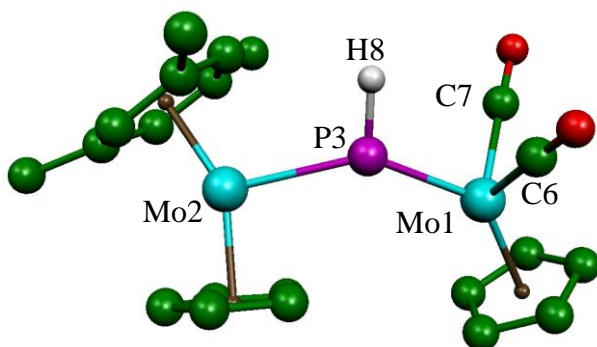

**Optimized geometry of *syn-3***

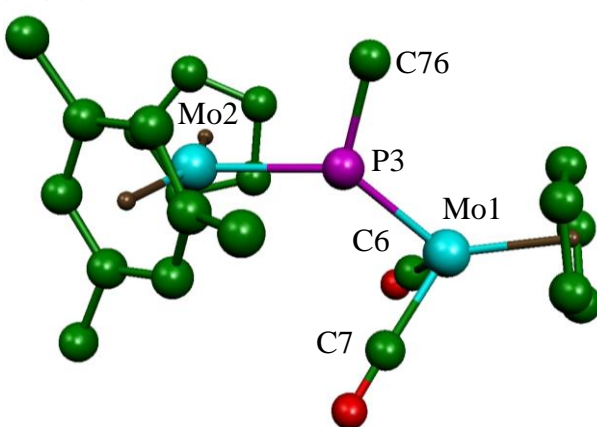

**Optimized geometry of *anti-3***

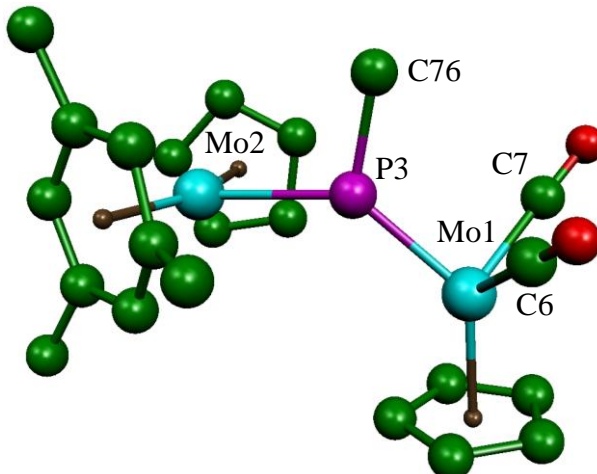

*Optimized geometry of M1-mod*

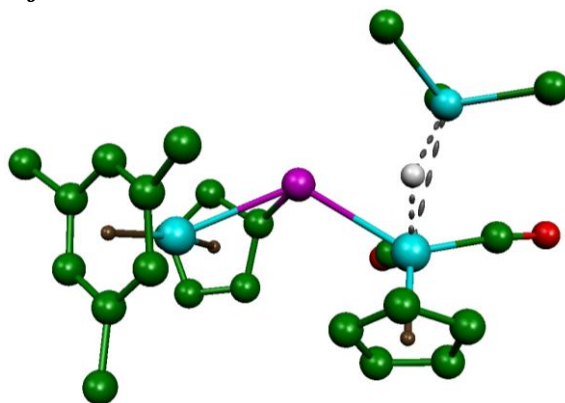

*Optimized geometry of 5-mod*

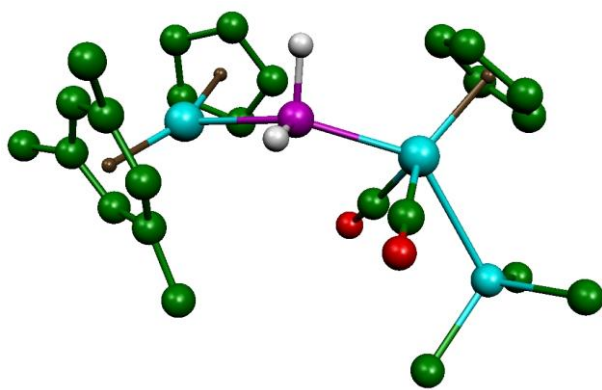

*Optimized geometry of P-mod*

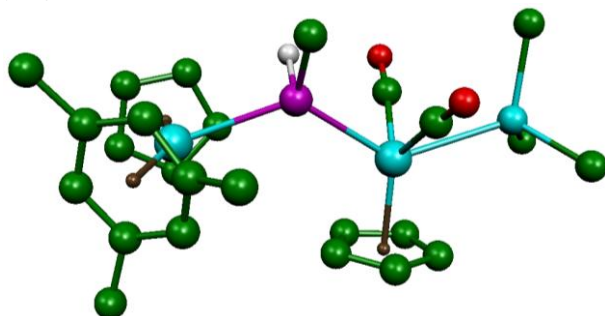

*Optimized geometry of 7-mod*

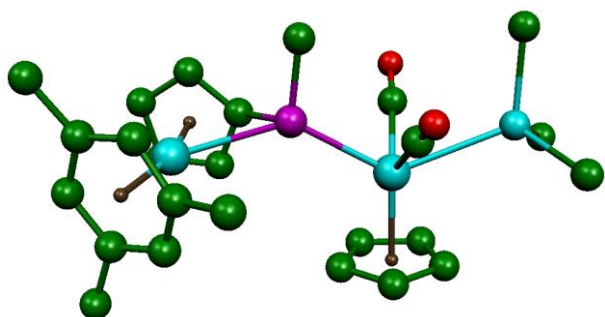

**Table S1:** Selected geometrical parameters for compounds **2** and **3** (distances in Å, angles in deg.)

| <b>Parameter</b> | <b><i>syn-2</i></b> | <b><i>syn-2R</i></b> | <b><i>anti-2</i></b> | <b><i>anti-2R</i></b> | <b><i>syn-3</i></b> | <b><i>anti-3</i></b> |
|------------------|---------------------|----------------------|----------------------|-----------------------|---------------------|----------------------|
| Mo1 – P3         | 2.292               | 2.301                | 2.287                | 2.314                 | 2.300               | 2.285                |
| Mo2 – P3         | 2.581               | 2.590                | 2.592                | 2.600                 | 2.603               | 2.609                |
| P3 – H/C         | 1.436               | 1.426                | 1.429                | 1.419                 | 1.886               | 1.875                |
| Mo1 – C6         | 1.966               | 1.970                | 1.964                | 1.966                 | 1.970               | 1.965                |
| Mo1 – C7         | 1.970               | 1.965                | 1.976                | 1.961                 | 1.957               | 1.970                |
| Mo1 – P3 – Mo2   | 144.1               | 146.4                | 139.9                | 144.4                 | 138.4               | 134.1                |
| Mo1 – P3 – H/C   | 111.1               | 108.6                | 117.2                | 111.7                 | 116.2               | 119.6                |
| Mo2 – P3 – H/C   | 102.5               | 104.8                | 102.6                | 103.9                 | 105.3               | 105.5                |
| C6 – Mo1 – C7    | 82.8                | 82.9                 | 82.1                 | 82.5                  | 80.8                | 82.6                 |
| C6 – Mo1 – P3    | 90.5                | 98.4                 | 90.8                 | 89.0                  | 95.7                | 91.5                 |
| C7 – Mo1 – P3    | 98.8                | 93.9                 | 90.9                 | 87.9                  | 93.7                | 89.9                 |

**Table S2:** Molecular orbitals of *syn-2*.

| OM       | Energy (eV) | Assignment                                        | Projection                                                                                                                                                         |
|----------|-------------|---------------------------------------------------|--------------------------------------------------------------------------------------------------------------------------------------------------------------------|
| LUMO 141 | -1.73       | $\pi^*_{\text{MoP}}$                              | 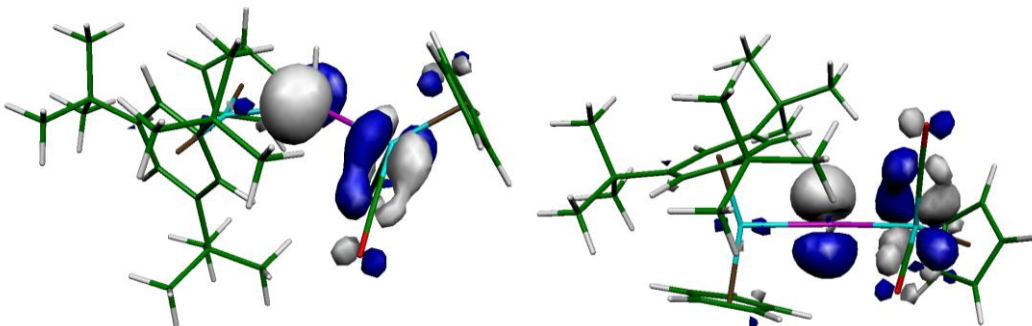 <p>Contributions (%): Mo1 29, Mo2 4, P3 35, H76 0, CO's 13, Ar 6, Other 13</p>  |
| HOMO 140 | -4.52       | $\text{LP}_{\text{Mo2}} + \text{LP}_{\text{Mo1}}$ |  <p>Contributions (%): Mo1 12, Mo2 62, P3 2, H76 1, CO's 4, Ar 14, Other 5</p>  |
| MO 139   | -4.66       | $\text{LP}_{\text{Mo2}}$                          |  <p>Contributions (%): Mo1 7, Mo2 55, P3 2, H76 1, CO's 2, Ar 22, Other 11</p> |
| MO 138   | -4.87       | $\text{LP}_{\text{Mo2}} + \pi_{\text{M-CO}}$      |  <p>Contributions (%): Mo1 49, Mo2 19, P3 3, H76 2, CO's 17, Ar 6, Other 5</p> |

MO 137

-5.02

$\pi_{\text{Mo-CO}}$

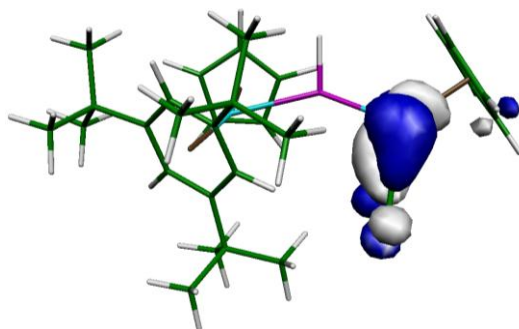

Contributions (%): Mo1 61, Mo2 0, P3 2, H76 1, CO's 28, Ar 1, Other 7

MO 136

-5.52

$\pi_{\text{MoP}}$

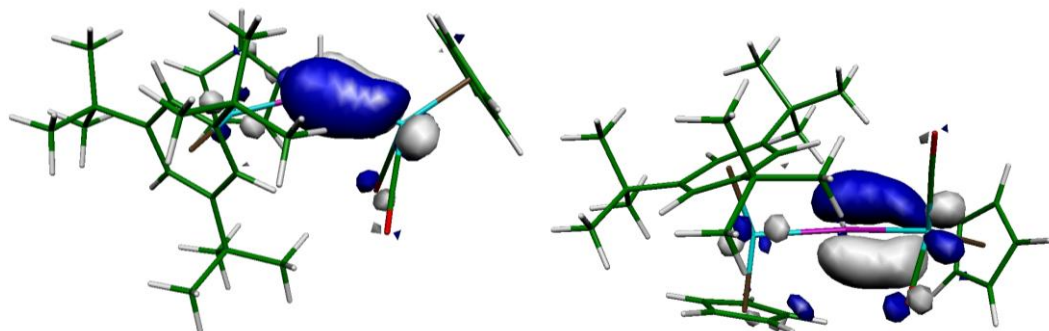

Contributions (%): Mo1 30, Mo2 7, P3 39, H76 0, CO's 6, Ar 4, Other 13

MO 132

-7.24

$\sigma_{\text{MoP}}$

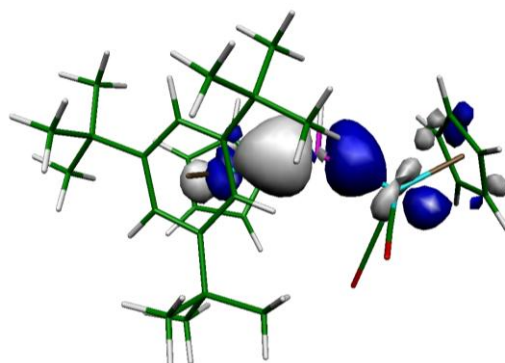

Contributions (%): Mo1 17, Mo2 21, P3 38, H76 0, CO's 1, Ar 5, Other 18

---



**Table S3:** Molecular orbitals of *syn-2R*.

| OM                                                                      | Projection                                                                           |
|-------------------------------------------------------------------------|--------------------------------------------------------------------------------------|
| Energy (eV)                                                             |                                                                                      |
| Assignment                                                              |                                                                                      |
| LUMO 141                                                                | 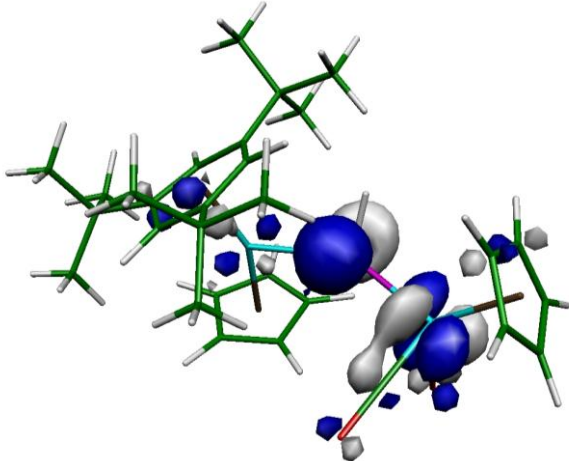   |
| -1.59                                                                   |                                                                                      |
| $\pi^*_{\text{MoP}}$                                                    |                                                                                      |
| Contributions (%): Mo1 26, Mo2 6, P3 31, H8 0, CO's 13, Ar 12, Other 12 |                                                                                      |
| HOMO 140                                                                |   |
| -4.56                                                                   |                                                                                      |
| $\text{LP}_{\text{Mo2}} + \pi_{\text{MoP}}$                             |                                                                                      |
| Contributions (%): Mo1 22, Mo2 40, P3 5, H8 0, CO's 5, Ar 18, Other 9   |                                                                                      |
| MO 139                                                                  |  |
| -4.63                                                                   |                                                                                      |
| $\text{LP}_{\text{Mo2}} + \pi_{\text{Mo-CO}}$                           |                                                                                      |
| Contributions (%): Mo1 42, Mo2 24, P3 4, H8 2, CO's 14, Ar 8, Other 6   |                                                                                      |

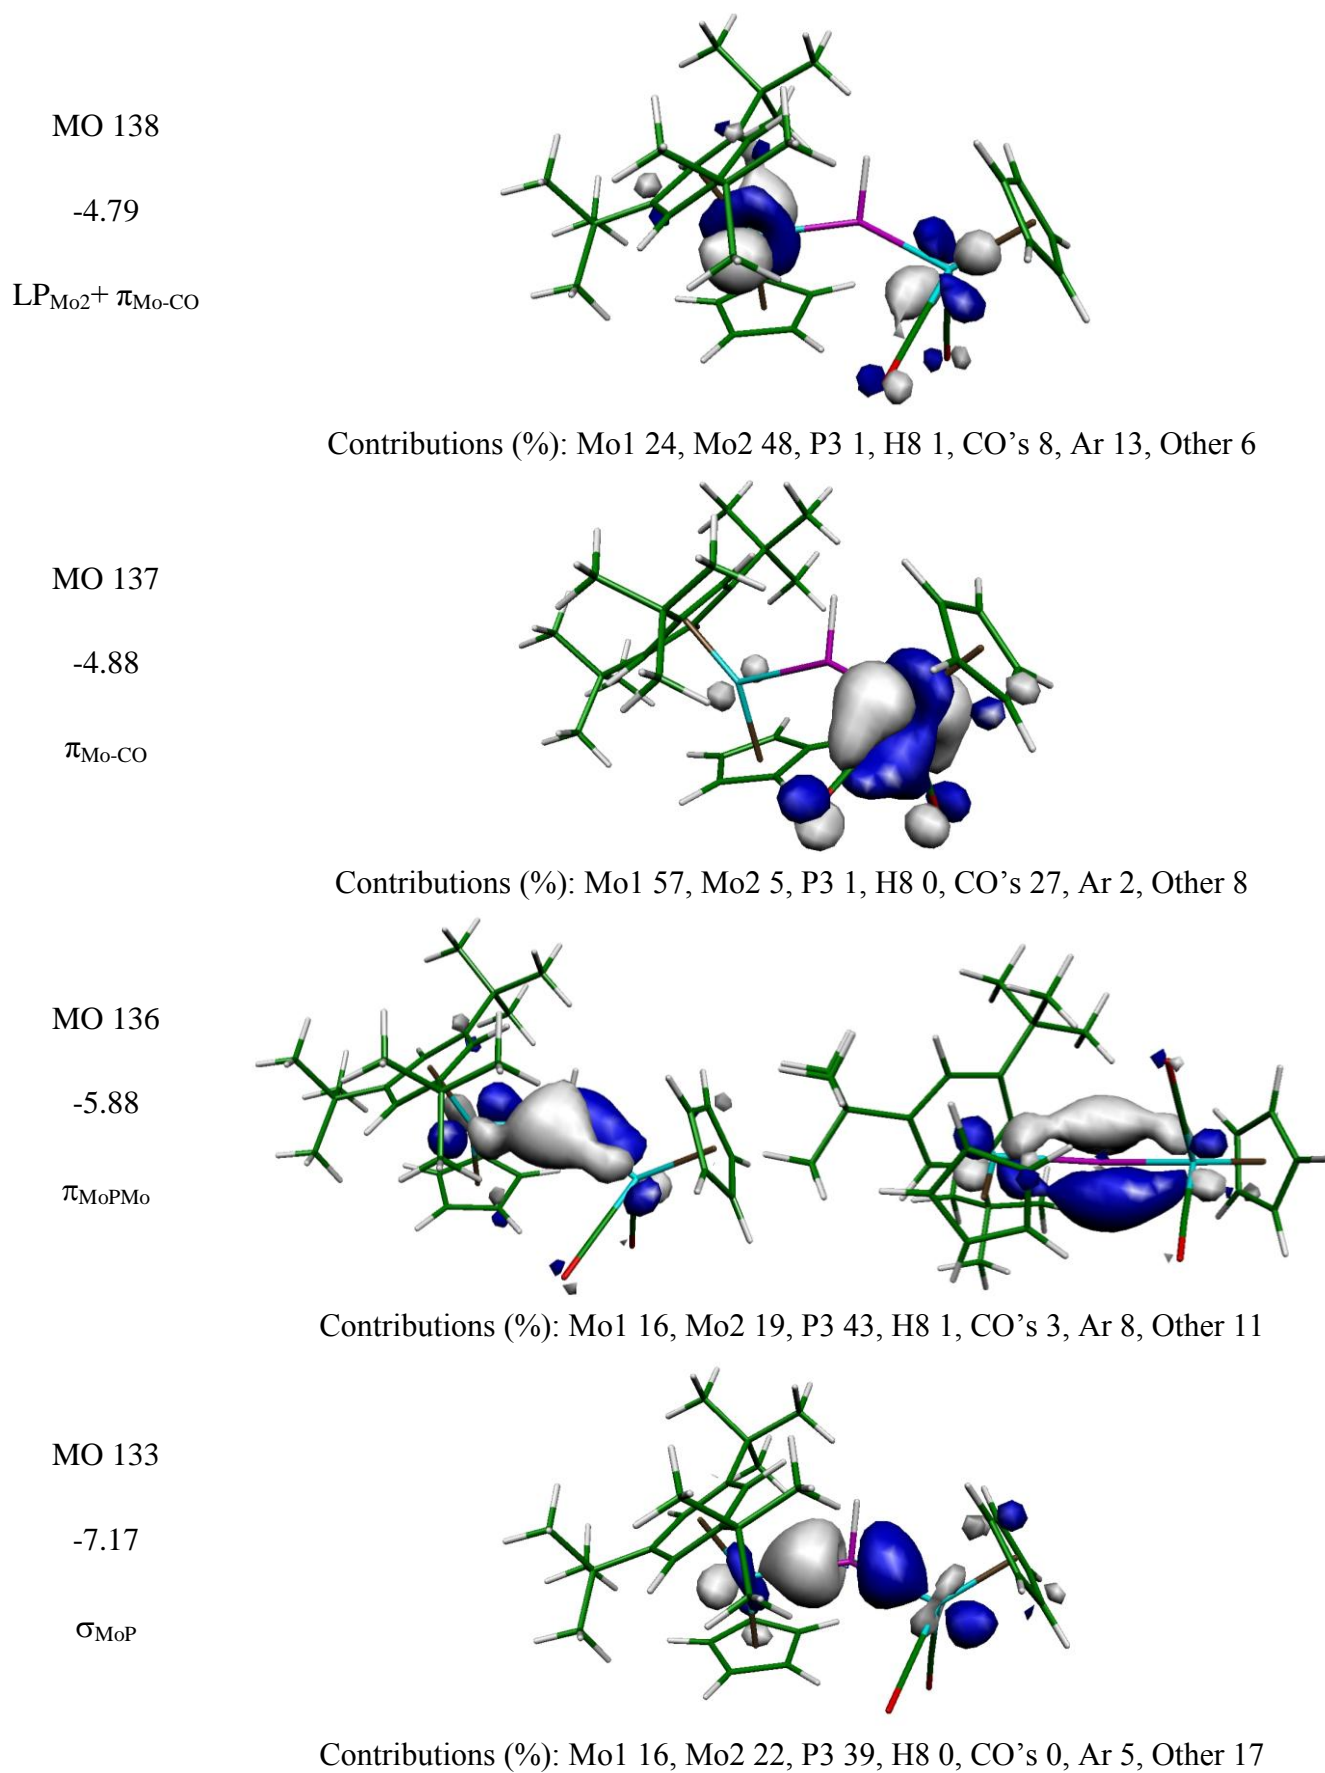

**Table S4:** Molecular orbitals of *anti-2*.

| OM                                                                     | Energy (eV) | Assignment               | Projection                                                                           |
|------------------------------------------------------------------------|-------------|--------------------------|--------------------------------------------------------------------------------------|
| LUMO 141                                                               | -1.69       | $\pi^*_{\text{MoP}}$     | 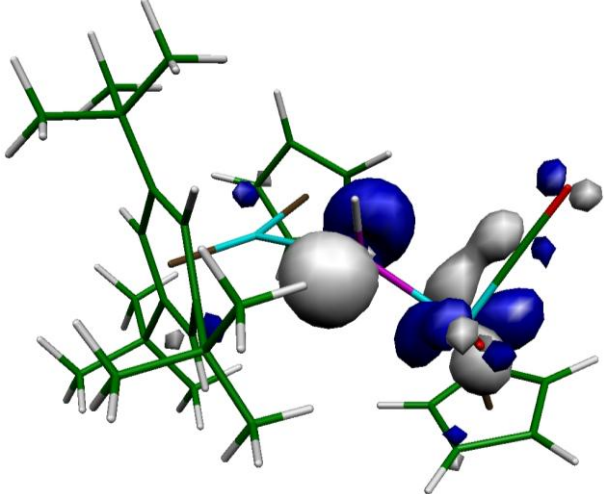   |
| Contributions (%): Mo1 31, Mo2 3, P3 34, H8 0, CO's 12, Ar 7, Other 13 |             |                          |                                                                                      |
| HOMO 140                                                               | -4.60       | $\text{LP}_{\text{Mo2}}$ |   |
| Contributions (%): Mo1 17, Mo2 58, P3 1, H8 1, CO's 5, Ar 12, Other 6  |             |                          |                                                                                      |
| MO 139                                                                 | -4.81       | Mo-Ar                    |  |

Contributions (%): Mo1 14, Mo2 47, P3 3, H8 0, CO's 4, Ar 21, Other 10

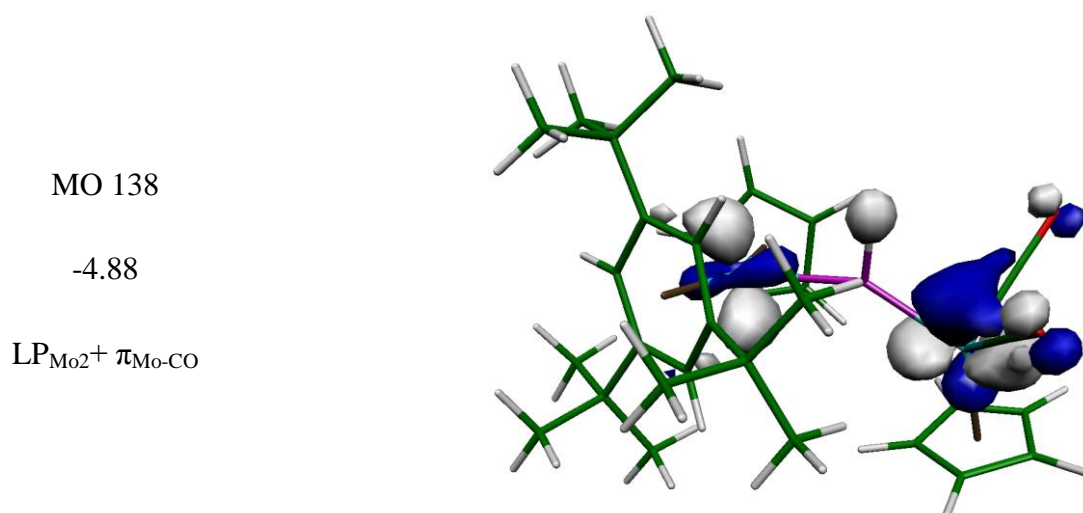

Contributions (%): Mo1 42, Mo2 27, P3 2, H8 4, CO's 12, Ar 9, Other 5

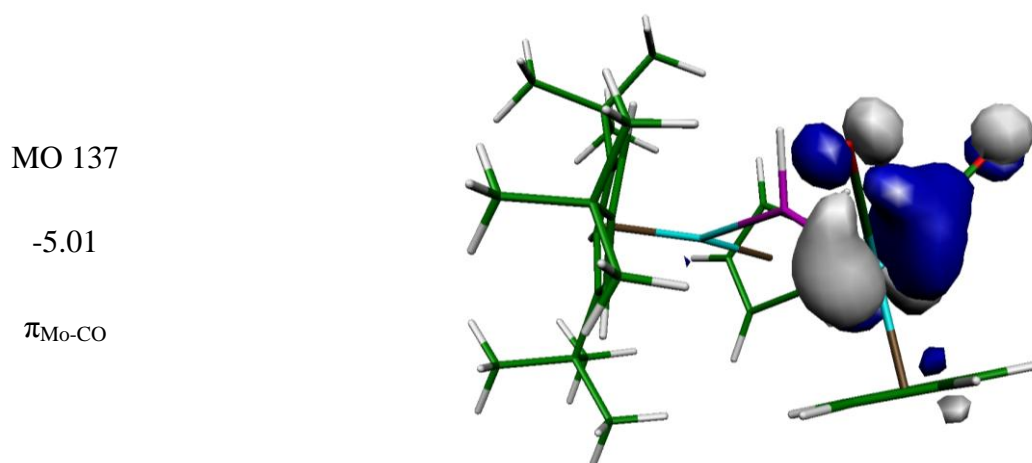

Contributions (%): Mo1 60, Mo2 2, P3 2, H8 0, CO's 27, Ar 1, Other 7

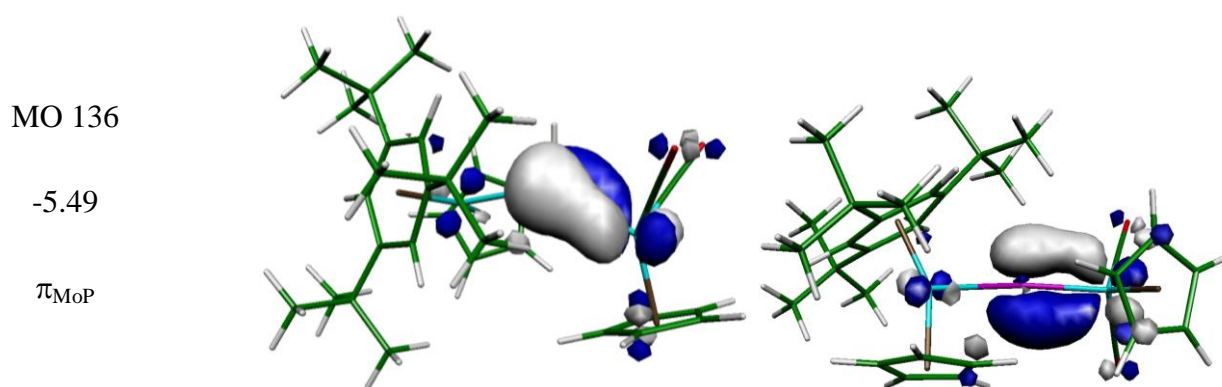

Contributions (%): Mo1 28, Mo2 7, P3 41, H8 0, CO's 5, Ar 5, Other 14

MO 135

-6.45

$\sigma_{\text{MoP}}$

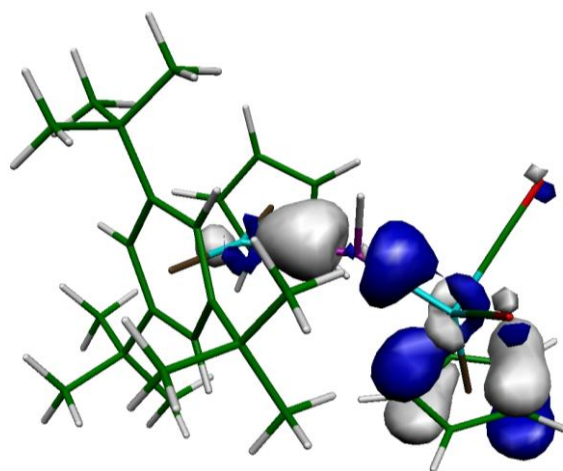

Contributions (%): Mo1 10, Mo2 10, P3 23, H8 0, CO's 5, Ar 2, Other 49

MO 132

-7.36

$\sigma_{\text{MoP}}$

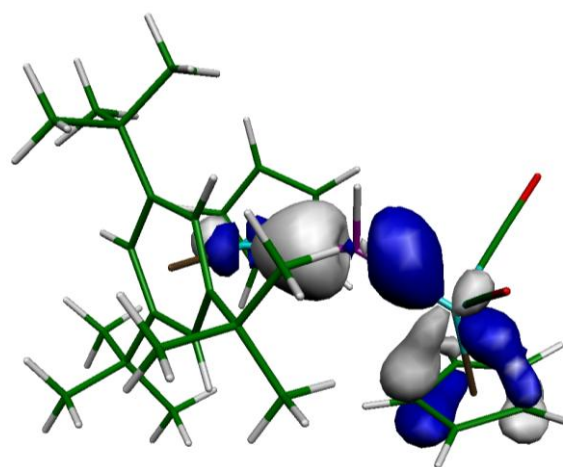

Contributions (%): Mo1 18, Mo2 18, P3 27, H8 0, CO's 1, Ar 4, Other 31

---

**Table S5:** Molecular orbitals of *anti-2R*.

| OM                                                                      | Energy (eV) | Assignment                                    | Projection                                                                           |
|-------------------------------------------------------------------------|-------------|-----------------------------------------------|--------------------------------------------------------------------------------------|
| LUMO 141                                                                | -1.52       | $\pi^*_{\text{MoP}}$                          | 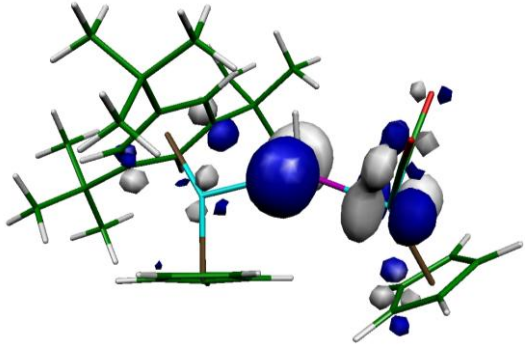   |
| Contributions (%): Mo1 28, Mo2 5, P3 32, H8 0, CO's 10, Ar 14, Other 12 |             |                                               |                                                                                      |
| HOMO 140                                                                | -4.56       | $\text{LP}_{\text{Mo2}} + \pi_{\text{MoP}}$   |   |
| Contributions (%): Mo1 20, Mo2 39, P3 7, H8 0, CO's 4, Ar 18, Other 10  |             |                                               |                                                                                      |
| MO 139                                                                  | -4.64       | $\pi_{\text{Mo-CO}} + \text{LP}_{\text{Mo2}}$ |  |
| Contributions (%): Mo1 55, Mo2 17, P3 2, H8 3, CO's 14, Ar 4, Other 5   |             |                                               |                                                                                      |
| MO 138                                                                  | -4.80       | $\text{LP}_{\text{Mo2}} + \pi_{\text{Mo-CO}}$ |  |
| Contributions (%): Mo1 17, Mo2 55, P3 1, H8 1, CO's 5, Ar 15, Other 6   |             |                                               |                                                                                      |

MO 137

-4.90

$\pi_{\text{Mo-CO}}$

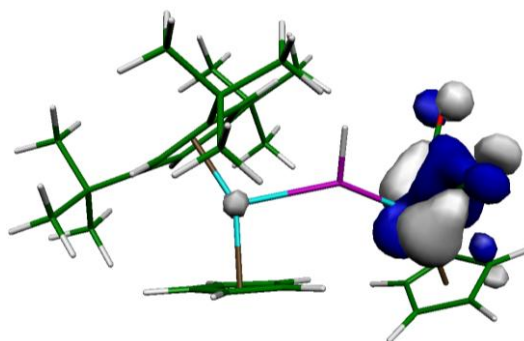

Contributions (%): Mo1 58, Mo2 5, P3 1, H8 0, CO's 27, Ar 2, Other 7

MO 136

-5.85

$\pi_{\text{MoPMo}}$

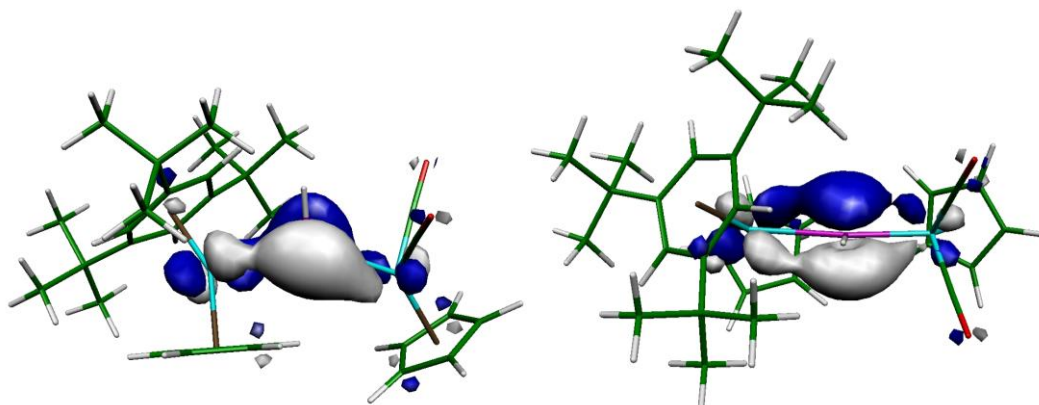

Contributions (%): Mo1 13, Mo2 22, P3 41, H8 0, CO's 3, Ar 8, Other 13

MO 133

-7.25

$\sigma_{\text{MoP}}$

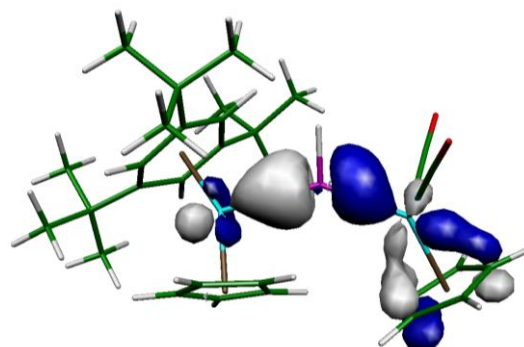

Contributions (%): Mo1 17, Mo2 18, P3 31, H8 0, CO's 1, Ar 5, Other 28

---

**Table S6:** Molecular orbitals of *syn-3*.

| OM                                                                     | Energy (eV) | Assignment                              | Projection                                                                           |
|------------------------------------------------------------------------|-------------|-----------------------------------------|--------------------------------------------------------------------------------------|
| LUMO 145                                                               | -1.64       | $\pi^*_{\text{MoP}}$                    | 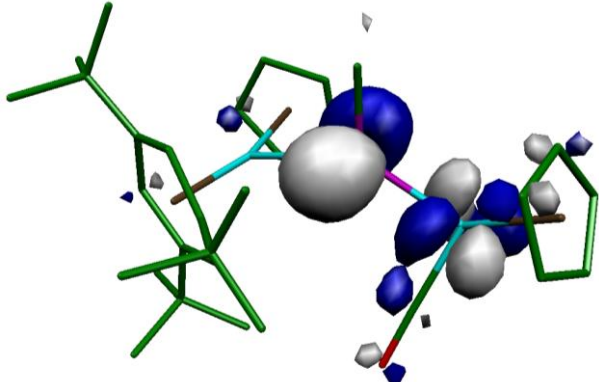   |
| Contributions (%): Mo1 27, Mo2 3, P3 35, Me 2, CO's 14, Ar 5, Other 13 |             |                                         |                                                                                      |
| HOMO 144                                                               | -4.44       | $\text{LP}_{\text{Mo2}}$                |   |
| Contributions (%): Mo1 10, Mo2 64, P3 1, Me 0, CO's 4, Ar 14, Other 6  |             |                                         |                                                                                      |
| MO 143                                                                 | -4.68       | $\text{Mo-Ar} + \text{LP}_{\text{Mo1}}$ |  |
| Contributions (%): Mo1 19, Mo2 46, P3 2, Me 0, CO's 6, Ar 20, Other 8  |             |                                         |                                                                                      |



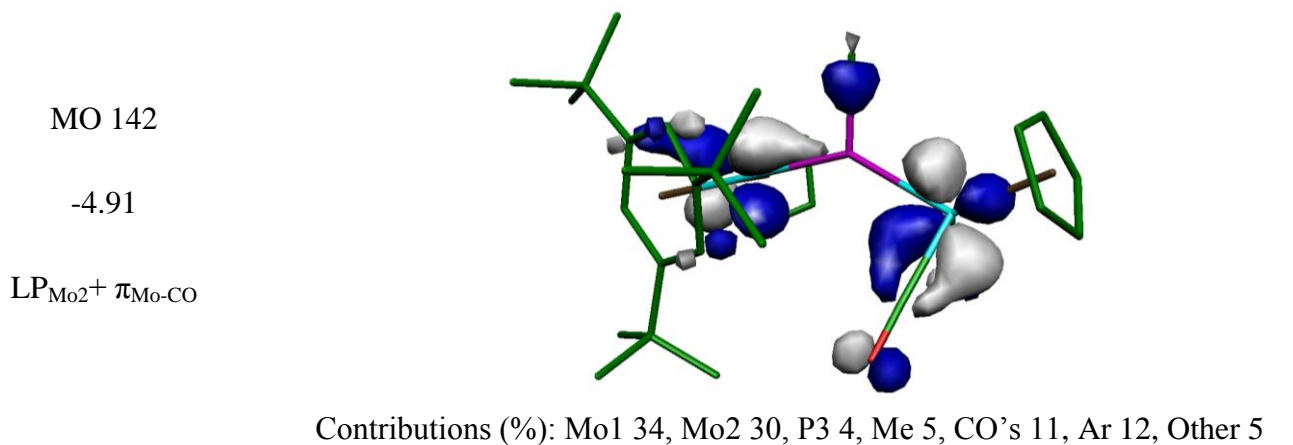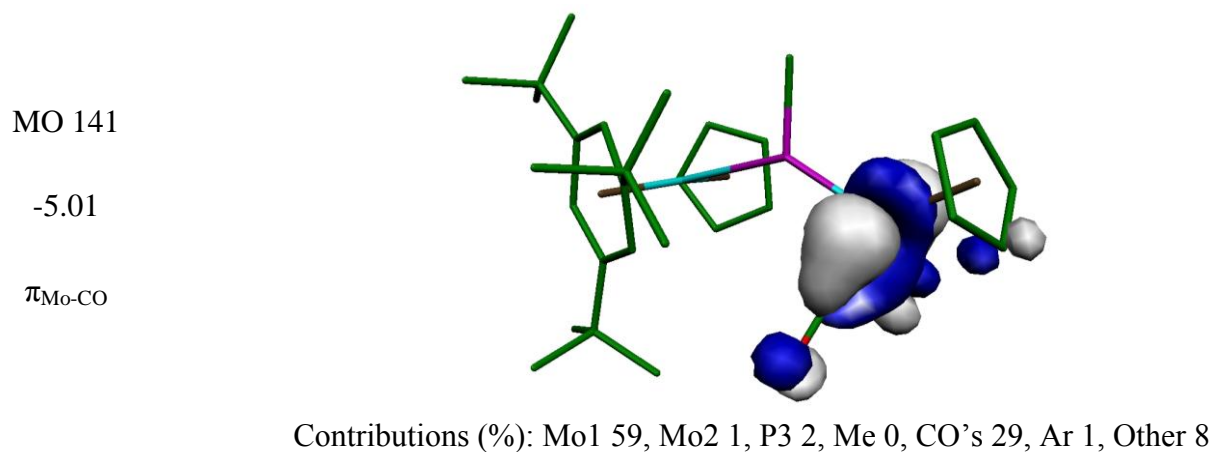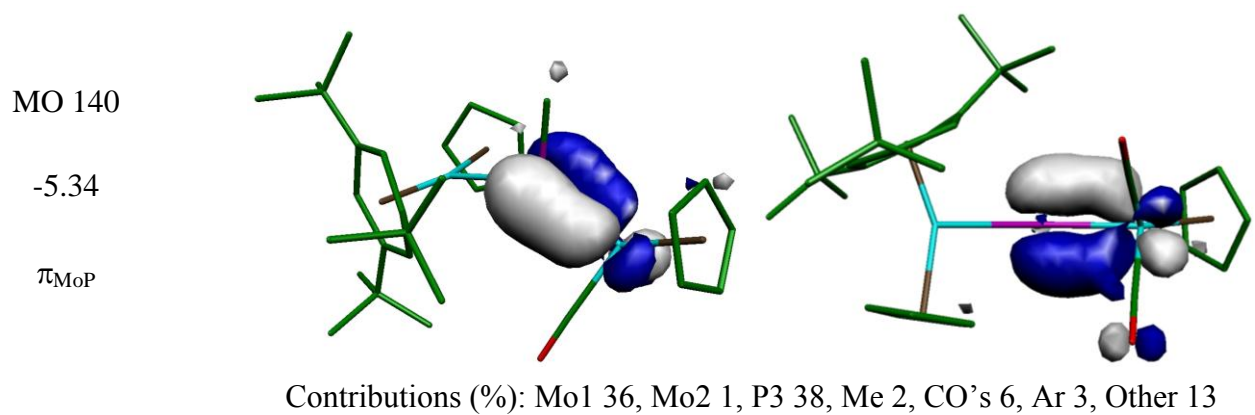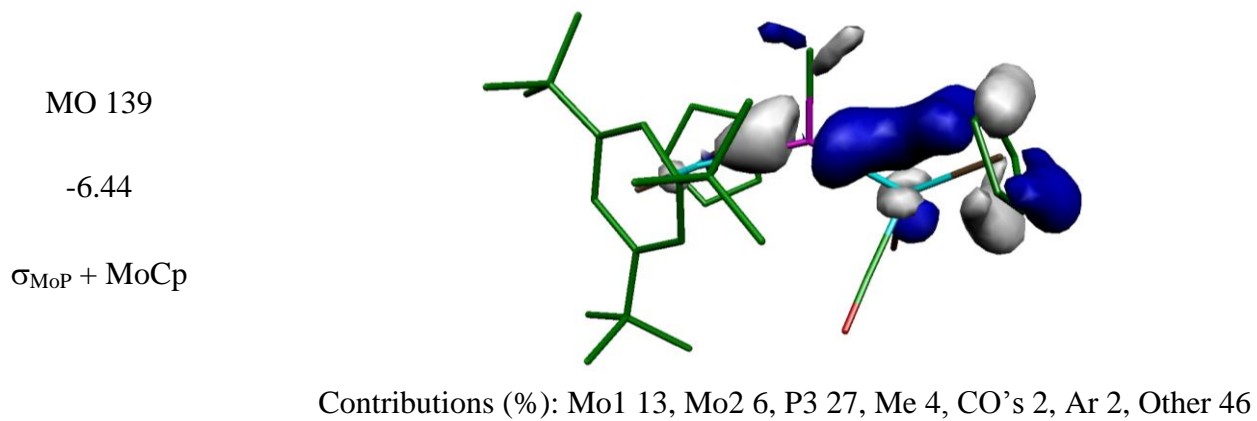

MO 136

-7.04

$\sigma_{\text{MoP}}$

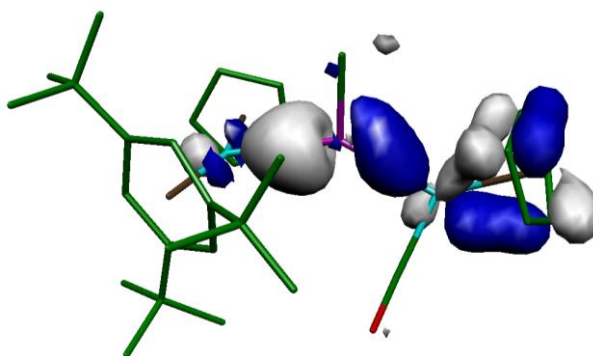

Contributions (%): Mo1 18, Mo2 15, P3 26, Me 3, CO's 2, Ar 4, Other 31

---

**Table S7:** Molecular orbitals of *anti-3*.

| OM                                                                     | Energy (eV) | Assignment                                        | Projection                                                                           |
|------------------------------------------------------------------------|-------------|---------------------------------------------------|--------------------------------------------------------------------------------------|
| LUMO 145                                                               | -1.58       | $\pi^*_{\text{MoP}}$                              | 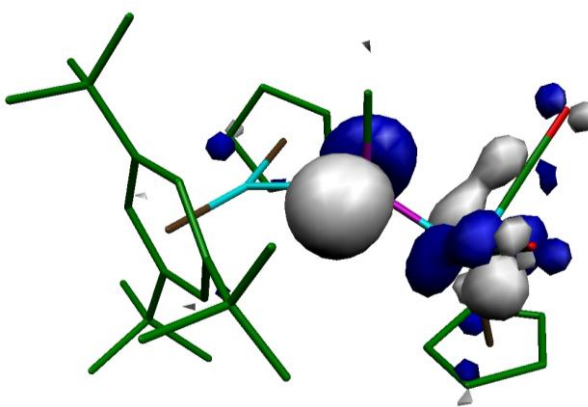   |
| Contributions (%): Mo1 29, Mo2 4, P3 34, Me 2, CO's 12, Ar 6, Other 13 |             |                                                   |                                                                                      |
| HOMO 144                                                               | -4.55       | $\text{LP}_{\text{Mo2}} + \text{LP}_{\text{Mo1}}$ |   |
| Contributions (%): Mo1 19, Mo2 55, P3 1, Me 1, CO's 5, Ar 12, Other 6  |             |                                                   |                                                                                      |
| MO 143                                                                 | -4.75       | $\text{Mo-Ar} + \text{LP}_{\text{Mo1}}$           |  |
| Contributions (%): Mo1 24, Mo2 3, P3 1, Me 0, CO's 7, Ar 16, Other 8   |             |                                                   |                                                                                      |

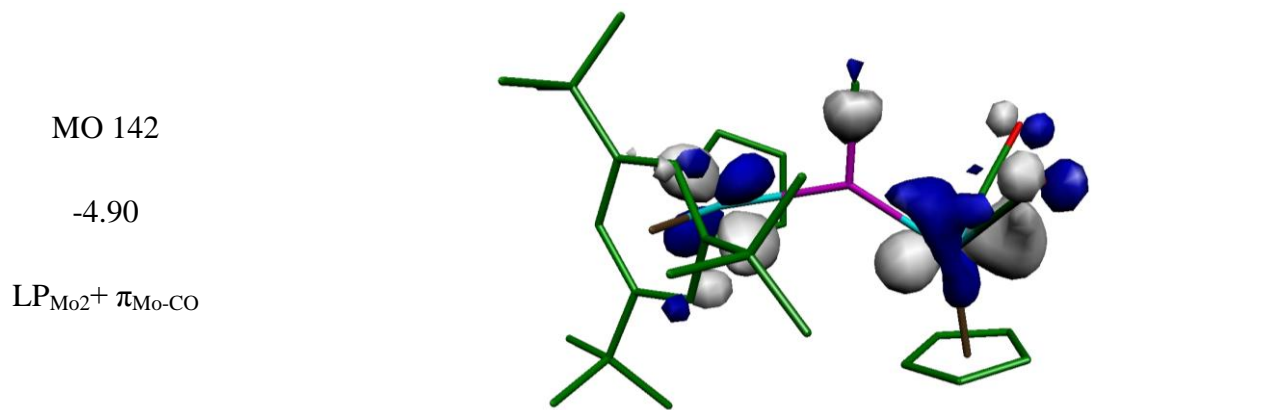

Contributions (%): Mo1 35, Mo2 26, P3 3, Me 5, CO's 13, Ar 11, Other 7

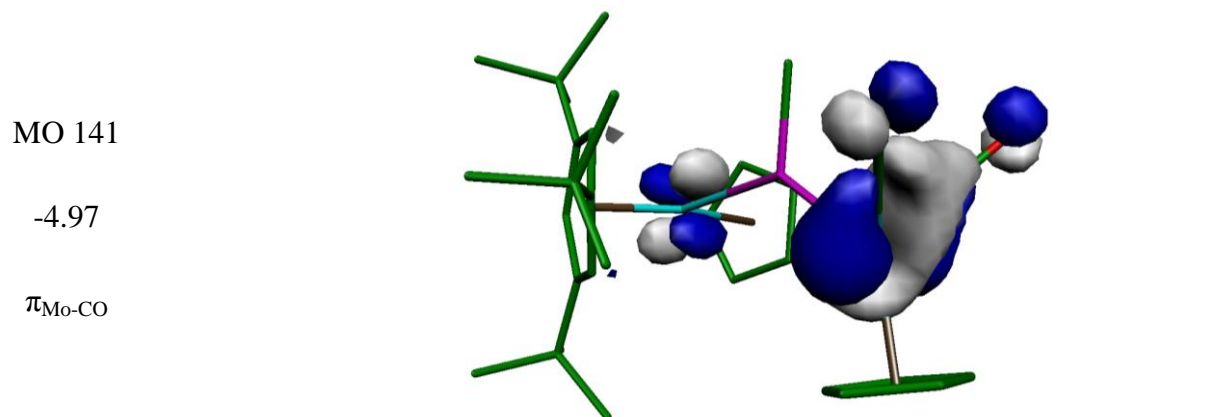

Contributions (%): Mo1 49, Mo2 14, P3 1, Me 0, CO's 23, Ar 6, Other 6

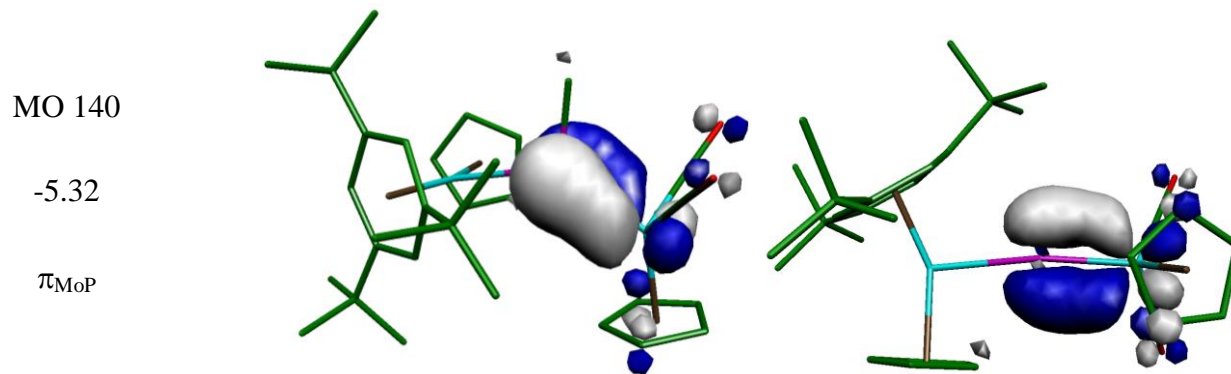

Contributions (%): Mo1 33, Mo2 2, P3 39, Me 2, CO's 6, Ar 4, Other 14

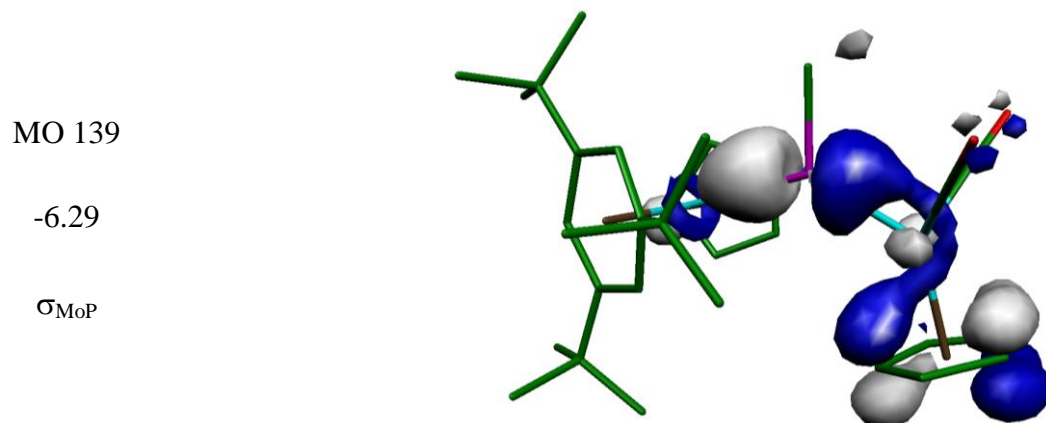

Contributions (%): Mo1 10, Mo2 12, P3 27, Me 2, CO's 4, Ar 3, Other 41

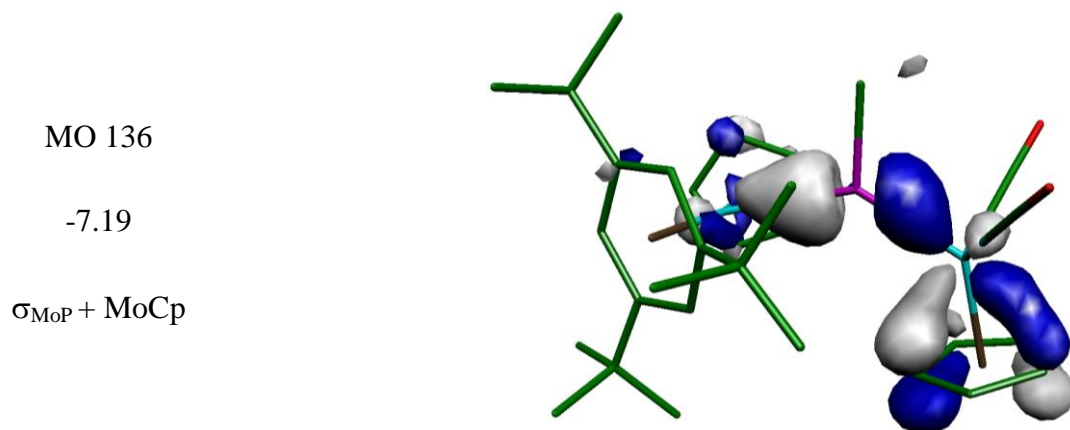

Contributions (%): Mo1 18, Mo2 12, P3 18, Me 2, CO's 1, Ar 5, Other 43

---

**Table S8:** DFT/B3LYP-calculated stretching wavenumbers  $\nu(\text{cm}^{-1})$  and relative intensities for *syn* and *anti* isomers of compounds **2** and **3**.

|                          | <i>syn-2</i> | <i>syn-2R</i> | <i>anti-2</i> | <i>anti-2R</i> | <i>syn-3</i> | <i>anti-3</i> |
|--------------------------|--------------|---------------|---------------|----------------|--------------|---------------|
| $\nu_{\text{CO,symm.}}$  | 1999 (100)   | 1999 (100)    | 2023 (100)    | 2015 (100)     | 1997 (100)   | 2015 (100)    |
| $\nu_{\text{CO,asymm.}}$ | 1944 (87)    | 1946 (75)     | 1970 (58)     | 1965 (61)      | 1938 (81)    | 1962 (61)     |

**Table S9:** DFT/B3LYP-calculated relative Gibbs Free Energies (Kcal/mol) in the gas phase.

|                          | <i>syn-2</i> | <i>syn-2R</i> | <i>anti-2</i> | <i>anti-2R</i> | <i>syn-3</i> | <i>anti-3</i> | <b>5-mod</b>      | <b>P-mod</b>     | <b>7-mod</b>      | <b>M1-mod</b>     |
|--------------------------|--------------|---------------|---------------|----------------|--------------|---------------|-------------------|------------------|-------------------|-------------------|
| $\Delta G_{298\text{K}}$ | 1.9          | 0             | 3.9           | 3.0            | 1.2          | 0             | -2.3 <sup>a</sup> | 6.5 <sup>b</sup> | -9.6 <sup>c</sup> | 28.2 <sup>d</sup> |

<sup>a</sup> Relative to *syn-2R* + HSnMe<sub>3</sub>. <sup>b</sup> Relative to *anti-3* + HSnMe<sub>3</sub>. <sup>c</sup> Calculated for the reaction *anti-3* + HSnMe<sub>3</sub> → **7-mod** + H<sub>2</sub>. <sup>d</sup> Relative to **1** + HSnMe<sub>3</sub>.

Energy profile for the rotation scan resulting from increasing the dihedral angle H8–P3–Mo1–C7 in *anti-2* by 45° steps.

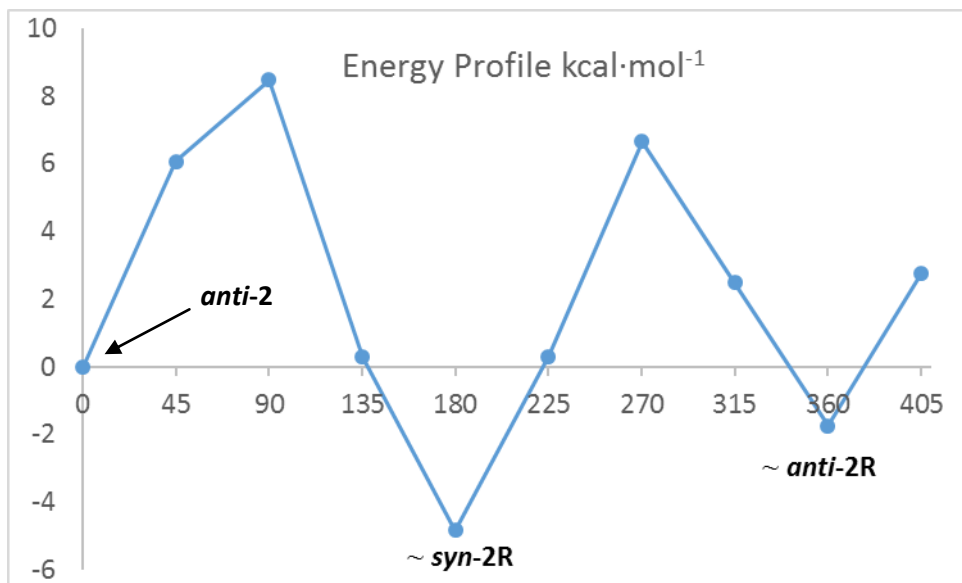

| Rotation                | Energy (kcal/mol) |
|-------------------------|-------------------|
| 0 ( <i>anti-2</i> )     | 0.0               |
| 45                      | 6.1               |
| 90                      | 8.5               |
| 135                     | 0.3               |
| 180 (~ <i>syn-2R</i> )  | -4.8              |
| 225                     | 0.3               |
| 270                     | 6.7               |
| 315                     | 2.5               |
| 360 (~ <i>anti-2R</i> ) | -1.7              |
| 405                     | 2.8               |

**Reference 42.** Frisch, M. J.; Trucks, G. W.; Schlegel, H. B.; Scuseria, G. E.; Robb, M. A.; Cheeseman, J. R.; Montgomery, J. A., Jr.; Vreven, T.; Kudin, K. N.; Burant, J. C.; Millam, J. M.; Iyengar, S. S.; Tomasi, J.; Barone, V.; Mennucci, B.; Cossi, M.; Scalmani, G.; Rega, N.; Petersson, G. A.; Nakatsuji, H.; Hada, M.; Ehara, M.; Toyota, K.; Fukuda, R.; Hasegawa, J.; Ishida, M.; Nakajima, T.; Honda, Y.; Kitao, O.; Nakai, H.; Klene, M.; Li, X.; Knox, J. E.; Hratchian, H. P.; Cross, J. B.; Bakken, V.; Adamo, C.; Jaramillo, J.; Gomperts, R.; Stratmann, R. E.; Yazyev, O.; Austin, A. J.; Cammi, R.; Pomelli, C.; Ochterski, J. W.; Ayala, P. Y.; Morokuma, K.; Voth, G. A.; Salvador, P.; Dannenberg, J. J.; Zakrzewski, V. G.; Dapprich, S.; Daniels, A. D.; Strain, M. C.; Farkas, O.; Malick, D. K.; Rabuck, A. D.; Raghavachari, K.; Foresman, J. B.; Ortiz, J. V.; Cui, Q.; Baboul, A. G.; Clifford, S.; Cioslowski, J.; Stefanov, B. B.; Liu, G.; Liashenko, A.; Piskorz, P.; Komaromi, I.; Martin, R. L.; Fox, D. J.; Keith, T.; Al-Laham, M. A.; Peng, C. Y.; Nanayakkara, A.; Challacombe, M.; Gill, P. M. W.; Johnson, B.; Chen, W.; Wong, M. W.; Gonzalez, C.; Pople, J. A. *Gaussian 03, Revision B.02*, Gaussian, Inc., Wallingford, CT, 2004.
